# Supplementary material
Source: PubMed Central journal article supplement (PMC10231879)
Supplement: NIHMS1881706-supplement-Supporting_Information.pdf [file NIHMS1881706-supplement-Supporting_Information.pdf]

**TITLE**

Hydra-elastin-like polypeptides increase rapamycin potency when targeted to cell-surface GRP78

**AUTHORS**

Hugo Avila<sup>1</sup>, Jingmei Yu<sup>1</sup>, Geetha Boddu<sup>1</sup>, Alvin Phan<sup>1</sup>, Anh Truong<sup>1</sup>, Santosh Peddi<sup>1</sup>, Hao Guo<sup>1</sup>, Shin-Jae Lee<sup>1,2</sup>, Mario Alba<sup>1</sup>, Ethan Canfield<sup>4</sup>, Vicky Yamamoto<sup>5</sup>, James C. Paton<sup>6</sup>, Adrienne W Paton<sup>6</sup>, Amy S. Lee<sup>5</sup>, J. Andrew MacKay<sup>1,2,3</sup>

**AFFILIATIONS**

1. USC School of Pharmacy, Department of Pharmacology and Pharmaceutical Sciences
2. USC Viterbi School of Engineering, Department of Biomedical Engineering
3. USC Keck School of Medicine, Department of Ophthalmology
4. USC School of Pharmacy, Mass Spectrometry Core
5. USC Keck School of Medicine, Department of Biochemistry and Molecular Medicine
6. University of Adelaide, Research Centre for Infectious Diseases, Department of Molecular and Biomedical Science

**CORRESPONDING AUTHOR INFORMATION**

MacKay, J. Andrew

1985 Zonal Ave., PSC 306A, Los Angeles, CA, 90089

Telephone: (323) 442-4118. Fax: (323) 442-4118. jamackay@usc.edu



L-5FA:

**MRLLDTNRP LLPYVPGAG**MGVQVETISPGDGRTFPKRGQTCVVHYTG MLEDGKKFDSSRDRNKPFKMLGKQEVIR  
GWEEGVAQMSVGQRAKLTISPDYAYGATGHPGIIPPHATLVFDVELLKLEGVPGAGVPGAGVPGAGVPGAGVPGAG  
VPGAGVPGAGVPGAGVPGAGVPGAGVPGAGVPGAGVPGAGVPGAGVPGAGVPGAGVPGAGVPGAGVPGAGVPGAGVPGAGV  
GAGVPGAGVPGAGVPGAGVPGAGVQVETISPGDGRTFPKRGQTCVVHYTG MLEDGKKFDSSRDRNKPFKMLGKQ  
EVIRGWEEGVAQMSVGQRAKLTISPDYAYGATGHPGIIPPHATLVFDVELLKLEGVPGAGVPGAGVPGAGVPGAGVPGAGV  
GAGVPGAGVPGAGVPGAGVPGAGVPGAGVPGAGVPGAGVPGAGVPGAGVPGAGVPGAGVPGAGVPGAGVPGAGVPGAGV  
GAGVPGAGVPGAGVPGAGVPGAGVPGAGVQVETISPGDGRTFPKRGQTCVVHYTG MLEDGKKFDSSRDRNKPFKML  
GKQEVIRGWEEGVAQMSVGQRAKLTISPDYAYGATGHPGIIPPHATLVFDVELLKLEGVPGAGVPGAGVPGAGVPGAGV  
GVPGAGVPGAGVPGAGVPGAGVPGAGVPGAGVPGAGVPGAGVPGAGVPGAGVPGAGVPGAGVPGAGVPGAGVPGAGV  
PGAGVPGAGVPGAGVPGAGVPGAGVPGAGVQVETISPGDGRTFPKRGQTCVVHYTG MLEDGKKFDSSRDRNKPFK  
MLGKQEVIRGWEEGVAQMSVGQRAKLTISPDYAYGATGHPGIIPPHATLVFDVELLKLEGVPGAGVPGAGVPGAGVPGAGV  
GAGVPGAGVPGAGVPGAGVPGAGVPGAGVPGAGVPGAGVPGAGVPGAGVPGAGVPGAGVPGAGVPGAGVPGAGVPGAGV  
GVPGAGVPGAGVPGAGVPGAGVPGAGVPGAGVQVETISPGDGRTFPKRGQTCVVHYTG MLEDGKKFDSSRDRNK  
PFKMLGKQEVIRGWEEGVAQMSVGQRAKLTISP DYAYGATGHPGIIPPHATLVFDVELLKLE

P6-5FA:

**MRLLDTNRP FLRYVPGAG**MGVQVETISPGDGRTFPKRGQTCVVHYTG MLEDGKKFDSSRDRNKPFKMLGKQEVIR  
GWEEGVAQMSVGQRAKLTISPDYAYGATGHPGIIPPHATLVFDVELLKLEGVPGAGVPGAGVPGAGVPGAGVPGAG  
VPGAGVPGAGVPGAGVPGAGVPGAGVPGAGVPGAGVPGAGVPGAGVPGAGVPGAGVPGAGVPGAGVPGAGVPGAGVPGAGV  
GAGVPGAGVPGAGVPGAGVPGAGVQVETISPGDGRTFPKRGQTCVVHYTG MLEDGKKFDSSRDRNKPFKMLGKQ  
EVIRGWEEGVAQMSVGQRAKLTISPDYAYGATGHPGIIPPHATLVFDVELLKLEGVPGAGVPGAGVPGAGVPGAGVPGAGV  
GAGVPGAGVPGAGVPGAGVPGAGVPGAGVPGAGVPGAGVPGAGVPGAGVPGAGVPGAGVPGAGVPGAGVPGAGVPGAGV  
GAGVPGAGVPGAGVPGAGVPGAGVPGAGVQVETISPGDGRTFPKRGQTCVVHYTG MLEDGKKFDSSRDRNKPFKML  
GKQEVIRGWEEGVAQMSVGQRAKLTISPDYAYGATGHPGIIPPHATLVFDVELLKLEGVPGAGVPGAGVPGAGVPGAGV  
GVPGAGVPGAGVPGAGVPGAGVPGAGVPGAGVPGAGVPGAGVPGAGVPGAGVPGAGVPGAGVPGAGVPGAGVPGAGV  
PGAGVPGAGVPGAGVPGAGVPGAGVPGAGVQVETISPGDGRTFPKRGQTCVVHYTG MLEDGKKFDSSRDRNKPFK  
MLGKQEVIRGWEEGVAQMSVGQRAKLTISPDYAYGATGHPGIIPPHATLVFDVELLKLEGVPGAGVPGAGVPGAGVPGAGV  
GAGVPGAGVPGAGVPGAGVPGAGVPGAGVPGAGVPGAGVPGAGVPGAGVPGAGVPGAGVPGAGVPGAGVPGAGVPGAGV  
GVPGAGVPGAGVPGAGVPGAGVPGAGVPGAGVQVETISPGDGRTFPKRGQTCVVHYTG MLEDGKKFDSSRDRNK  
PFKMLGKQEVIRGWEEGVAQMSVGQRAKLTISP DYAYGATGHPGIIPPHATLVFDVELLKLE

**P13-5FA:**

**MRLLDTNRPFLFYVPGAG**MGVQVETISPGDGRTFPPKRGQTCVVHYTGMLEDGKKFDSSRDRNKPFKFMLGKQEVIR  
GWEEGVAQMSVGQRAKLTISPDYAYGATGHPGIIPPHATLVFDVELLKLEGVPGAGVPGAGVPGAGVPGAGVPGAG  
VPGAGVPGAGVPGAGVPGAGVPGAGVPGAGVPGAGVPGAGVPGAGVPGAGVPGAGVPGAGVPGAGVPGAGVPGAGV  
GAGVPGAGVPGAGVPGAGVPGAGVQVETISPGDGRTFPPKRGQTCVVHYTGMLEDGKKFDSSRDRNKPFKFMLGKQ  
EVIRGWEEGVAQMSVGQRAKLTISPDYAYGATGHPGIIPPHATLVFDVELLKLEGVPGAGVPGAGVPGAGVPGAGVPGAGV  
GAGVPGAGVPGAGVPGAGVPGAGVPGAGVPGAGVPGAGVPGAGVPGAGVPGAGVPGAGVPGAGVPGAGVPGAGVPGA  
GVPAGVPGAGVPGAGVPGAGVPGAGVQVETISPGDGRTFPPKRGQTCVVHYTGMLEDGKKFDSSRDRNKPFKFML  
GKQEVIRGWEEGVAQMSVGQRAKLTISPDYAYGATGHPGIIPPHATLVFDVELLKLEGVPGAGVPGAGVPGAGVPGAGV  
GVPAGVPGAGVPGAGVPGAGVPGAGVPGAGVPGAGVPGAGVPGAGVPGAGVPGAGVPGAGVPGAGVPGAGVPGAGV  
PGAGVPGAGVPGAGVPGAGVPGAGVQVETISPGDGRTFPPKRGQTCVVHYTGMLEDGKKFDSSRDRNKPFKFML  
MLGKQEVIRGWEEGVAQMSVGQRAKLTISPDYAYGATGHPGIIPPHATLVFDVELLKLEGVPGAGVPGAGVPGAGVPGAGV  
GAGVPGAGVPGAGVPGAGVPGAGVPGAGVPGAGVPGAGVPGAGVPGAGVPGAGVPGAGVPGAGVPGAGVPGAGVPGA  
GVPAGVPGAGVPGAGVPGAGVPGAGVQVETISPGDGRTFPPKRGQTCVVHYTGMLEDGKKFDSSRDRNKPFK  
FKFMLGKQEVIRGWEEGVAQMSVGQRAKLTISPDYAYGATGHPGIIPPHATLVFDVELLKLE

**Supplemental Table S2: MALDI-TOF (M+XH)/X charge states**

| Charge state | 5FA (Da) | W (Da)  | L (Da)  | P6 (Da) | P13 (Da) |
|--------------|----------|---------|---------|---------|----------|
| (M+1H)/1     | 95527.9  | 97486.5 | 97657.5 | 97549.2 | 97852.3  |
| (M+2H)/2     | 47684.5  | 48845.3 | 48976   | 48899   | 48904.7  |
| (M+3H)/3     | 32178.1  | 32558.2 | 32606.2 | 32617   | 32485.6  |

**Supplemental Table S3: Molar Extinction Coefficients for ELPs as Evaluated by UV-Vis 280 nm**

| Sample                                                                    | 5FA    | W-5FA  | L-5FA  | P6-5FA | P13-5FA |
|---------------------------------------------------------------------------|--------|--------|--------|--------|---------|
| Extinction coefficient ( $A_{280\text{ nm}} M^{-1}cm^{-1}$ ) <sup>1</sup> | 50,100 | 61,100 | 51,590 | 51,590 | 51,590  |

<sup>1</sup> Estimated using Pace et al. (1995)

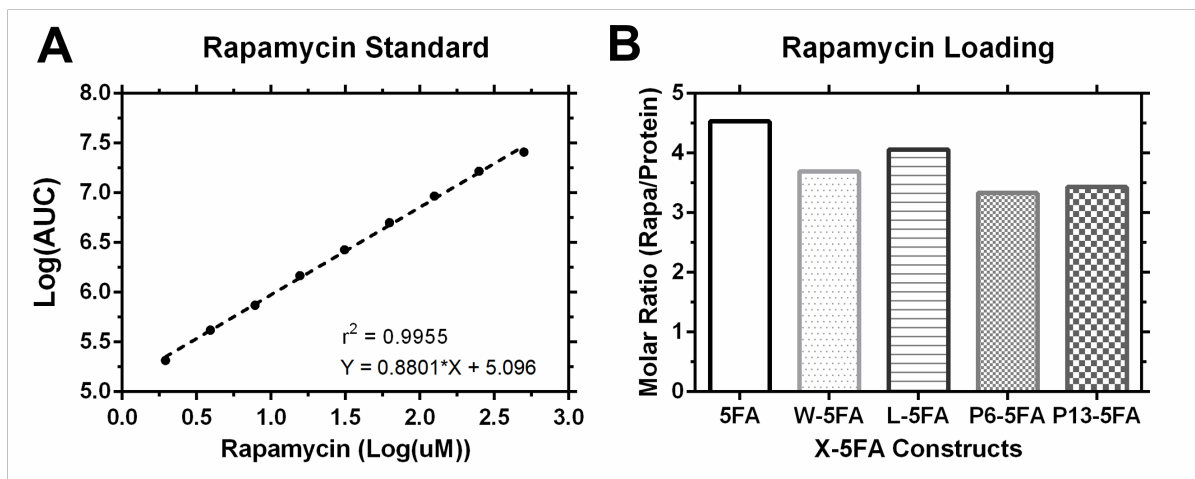

**Supplemental Figures S1. Analytical Reverse Phase High Performance Liquid Chromatography was used to quantify rapamycin.** RP-HPLC was performed as described in the methods. **A)** Using the AUCs observed after injection of standards, a linear calibration curve was developed. This curve was used to estimate the rapamycin concentrations within unknown samples, which were 725, 58, 211, 150, 266 uM for 5FA, W-5FA, L-5FA, P6-5FA, and P16-5FA respectively. The protein concentrations were estimated independently using UV-Vis spectroscopy at 280 nm using the molar extinction coefficients for each Hydra-ELP (**Supplemental Fig S3**), which were 160, 16, 52, 45, and 78 uM for 5FA, W-5FA, L-5FA, P6-5FA, and P16-5FA respectively. **B)** Using these, the loading ratio of Rapamycin per molecule was estimated at 4.5, 3.7, 4.1, 3.3, and 3.4 for 5FA, W-5FA, L-5FA, P6-5FA, and P16-5FA, respectively.

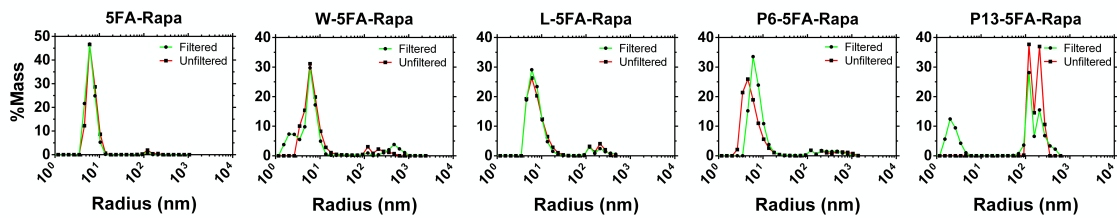

**Supplemental Figure S2. Distribution of Hydrodynamic Radii of Hydra-ELPs complexed with Rapamycin.** Rapamycin loaded Hydra-ELPs were characterized by dynamic light scattering with and without filtration to analyze the distribution of particle diameters. Rapamycin does not appear to significantly affect the radius of loaded Hydra-ELPs except for P13-5FA-Rapamycin, which shows a significant distribution between  $10^2$  nm and  $10^3$  nm. Filtration through a  $0.02 \mu\text{m}$  filter does not appear to affect distribution except for P13-5FA-Rapa, which is split into two populations, one of which overlaps with the unfiltered population ( $X > 100$  nm). A slightly smaller proportion of the unfiltered P13-5FA-Rapa population has a radius similar to filtered P13-5FA without rapamycin (**Fig. 4B**). For the remaining, there is a slight increase in radius to about 10 nm for all Hydra-ELPs, except for P13-5FA-Rapa, which remains consistent with filtered P13-5FA without rapamycin.

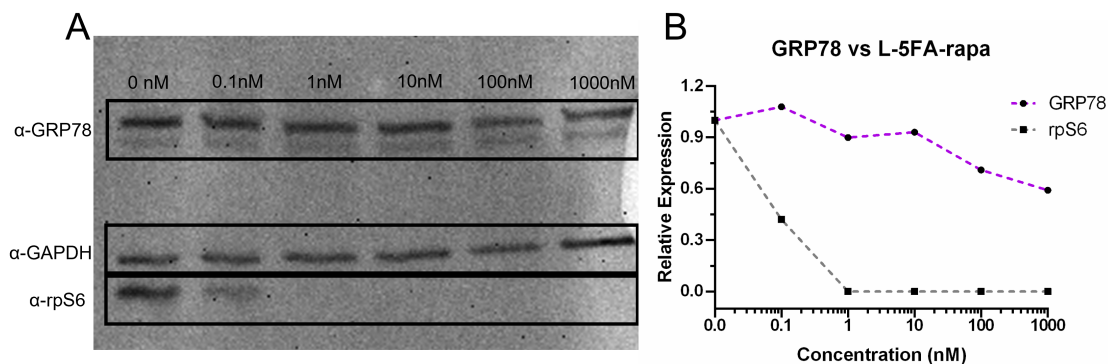

**Supplemental Figure S3: GRP78 expression is attenuated after treatment with L-5FA-rapa in a concentration dependent manner.** After samples from a concentration-based assay were imaged for rpS6 and GAPDH (**Fig. 6A**), the membrane was blocked with 5% BSA and incubated with anti-BiP/GRP78 rabbit mAb (Cell Signaling Technologies Inc., Boston, MA, Part #3177) overnight at  $4^\circ\text{C}$ . **A**) Images were acquired after incubation with anti-rabbit horse radish peroxidase and imaged on an iBright system. The relative expression of GRP78 and rpS6 at each concentration were normalized to GAPDH and quantified as a ratio to 0 nM. While rpS6 phosphorylation appears to significantly decrease with increasing L-5FA-rapa concentration ( $\sim 1$  nM), GRP78 is marginally affected beginning at ( $\sim 100$  nM). **B**) GRP78 appears to slightly decrease relative to GAPDH, but not directly proportional to a decrease in rpS6 phosphorylation. The data confirms reports in literature that suggest exposure to rapamycin affects mTORC1-dependent expression of GRP78. This effect appears to be at a range beyond the relevant therapeutic concentration for rpS6 phosphorylation.

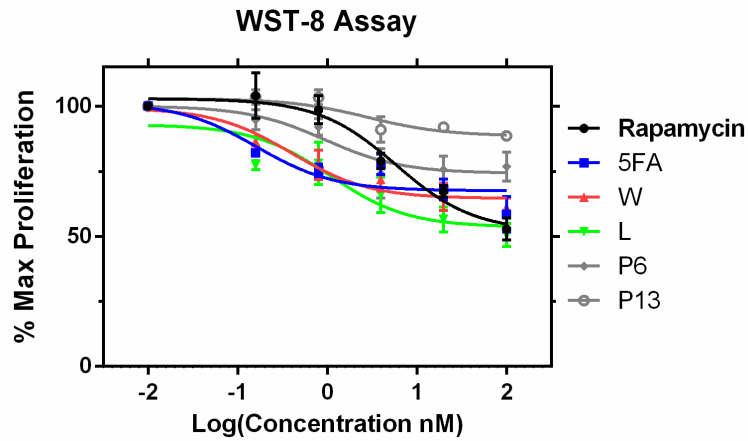

**Supplemental Figure S4: BT474 cells were treated with Hydra-ELPs loaded with rapamycin and assayed using a cell-viability assay.** After reaching 30% confluence, cells were treated with Hydra-ELPs (5FA, W-5FA, L-5FA, P6-5FA, or P13-5FA) loaded with rapamycin at the following concentrations: 100, 20, 4, 0.8, or 0.16 nM. Cells were incubated for 48-hrs and assayed using the WST-8 reagent (Abcam, #228554) following the manufacturer protocol and read for absorbance 450 nm. Data is displayed as Log(concentration) vs. the percent of maximum possible proliferation. The absorbance of each sample was normalized to the difference between the untreated cells and cell-free blank wells. After fitting to a dose-response curve in Graphpad Prism, IC50 values were calculated for Rapamycin, 5FA-Rapa, W-5FA-Rapa, L-5FA-Rapa, P6-Rapa, and P13-5FA-Rapa at 5.8 ( $\pm 13.8$ ) nM, 0.17 ( $\pm 0.70$ ) nM, 0.49 ( $\pm 1.15$ ) nM, 0.80 ( $\pm 4.7$ ) nM, 0.94 ( $\pm 3.9$ ) nM, and 2.8 ( $\pm 22.6$ ) nM, respectively. Values indicate mean ( $\pm$ SD) for triplicates.
